# Supplementary material for: Simulations of Extrusion 3D Printing of Chitosan Hydrogels
Source: MDPI journal article supplement (doi:10.3390/app12157530), 2022-07-27
Supplement: s1 [file s1]

Archive with 1 entries (1 files):
- applsci-1773425-supplementary.pdf
